# Supplementary material
Source: MDPI journal article supplement (https://www.mdpi.com/2077-0472/13/10/2012)
Supplement: s1 [file s1]

## Physiological and biochemical parameters of field bean (*Vicia faba* var. *minor*) seeds stored for 33 years

Dariusz J. Michalczyk\*, Magdalena Krupka, Jan Kamiński, Marta Wierzbicka, Sonia Floryńska, Wiktor Kopec and Agnieszka I. Piotrowicz-Cieślak

Department of Plant Physiology, Genetics and Biotechnology, University of Warmia and Mazury, Oczapowskiego Str. 1A, Olsztyn, 10-719, Poland

\*Correspondence: darim@uwm.edu.

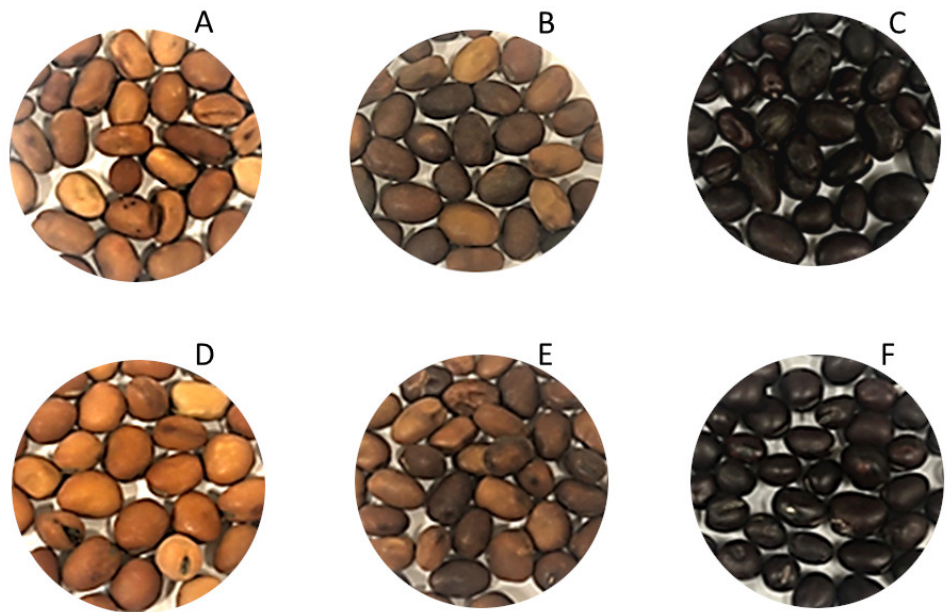

**Figure S1.** The appearance of field bean seeds cv. Dino: A – seeds stored at – 14 °C, B – seeds stored at +4 °C, C – seeds stored at +20 °C and cv. Nadwiślański: D – seeds stored at – 14 °C, E - seeds stored at +4 °C, F - seeds stored at +20 °C.
